# Supplementary material
Source: publisher site journal article supplement (https://www.dovepress.com/get_supplementary_file.php?f=471502.docx)
Supplement: Supplementary file 1 [file get_supplementary_file.php]

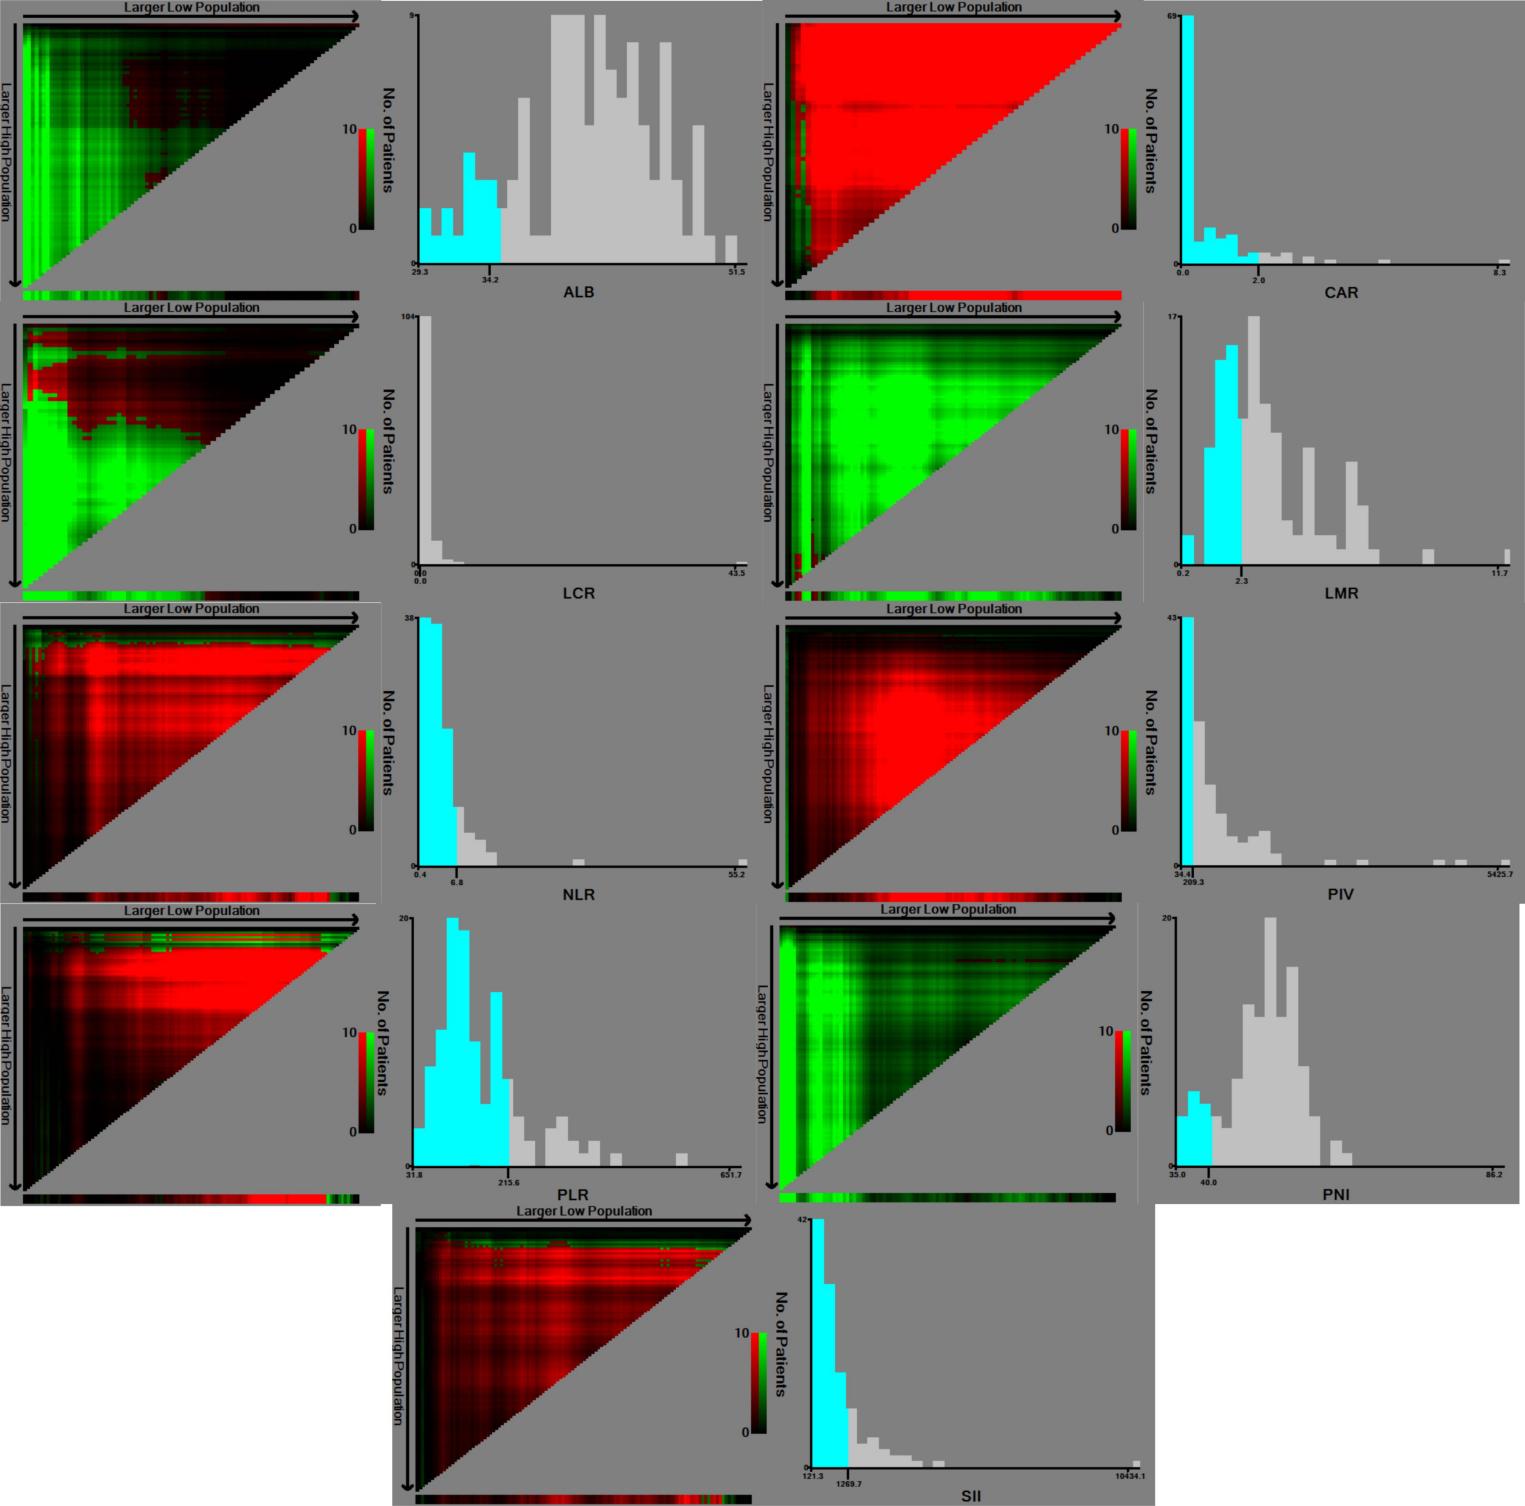
**Supplemental Figure 1** Schematic diagram of the method to determine the optimal cutoff points for survival prediction for ALB, PLR, NLR, LCR, LMR, SII, CAR, PNI, and PIV using X-tile software for survival prediction.

**Supplemental Table 1** The reported prognostive value of inflammation based scores for immunotherapy efficacy in patients with biliary tract carcinoma.

| Author | Published journal and date | The IBS studied | Primary tumor | Intervention | Enrolled patients number | Result  (Positive/Negative) |
| --- | --- | --- | --- | --- | --- | --- |
| Yuting Pan et al. | *J ONCOL*.2022 | lung immune prognostic index (LIPI) | Advanced BTCs | Immunotherapy | 110 | Positive |
| Jingjing Li et al | Clin Transl Med  . 2020 | Inflammation-related indicators | Advanced microsatellite stable BTCs | Immunotherapy | 26 | Negative |
| Fei Du et al. | *J LEUKOCYTE BIOL*. 2021 | immune-inflammation index (SII) ,cytokine IFN-inducible protein-10(IP-10) and macrophage inflammatory protein-1β | Advanced BTCs | Immunotherapy | 60 | Positive |
| Zhenyun Yang et al. | Inflamm Res  . 2022 | C-reactive protein score | Intrahepatic Cholangiocarcinoma | Anti-PD-1 therapy | 73 | Positive |

Abbreviations: IBS, Inflammation based score; BTC, Bilary tract carcinoma; PD-1, programmed cell death protein 1.
